# Supplementary material for: 2-Methylquinazoline derivative 23BB as a highly selective histone deacetylase 6 inhibitor alleviated cisplatin-induced acute kidney injury
Source: Oxford University Press journal article supplement (doi:10.1042/bsr20191538), 2020-01-01
Supplement: bsr-2019-1538_supp.pdf [file bsr-2019-1538_supp.pdf]

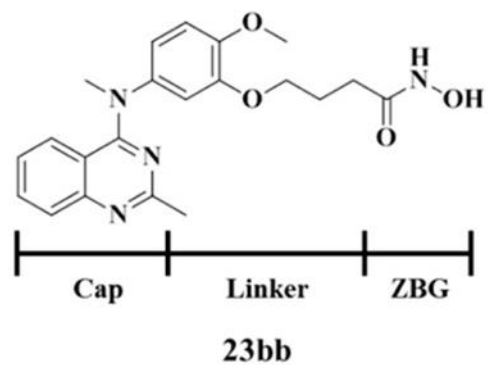

Oral bioavailability  $F = 47.0\%$  (rats);

HDAC1 = 422 nM; HDAC6 = 17 nM; HDAC8 = 3398 nM.

Figure S1. Chemical structure and biological activity of 23BB.

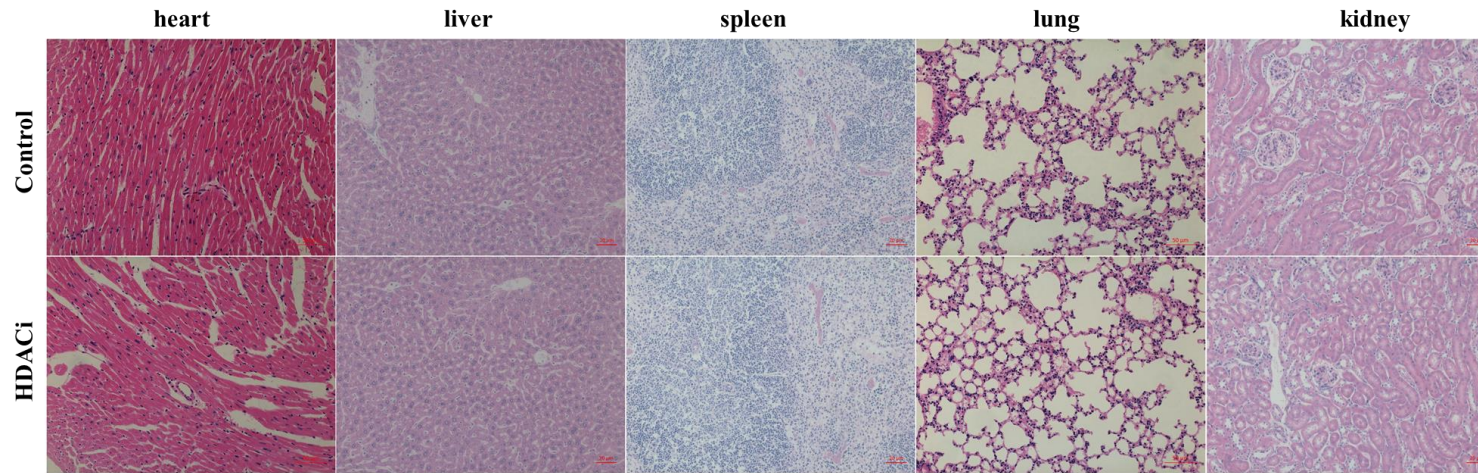

**Figure S2. No pathologic changes of HDAC6i 23BB on Heart, Liver, Spleen, Lung and Kidney tissues.** HDAC6i was orally administrated to C57 mice at a dose of 40 mg/kg/d for 3 days.

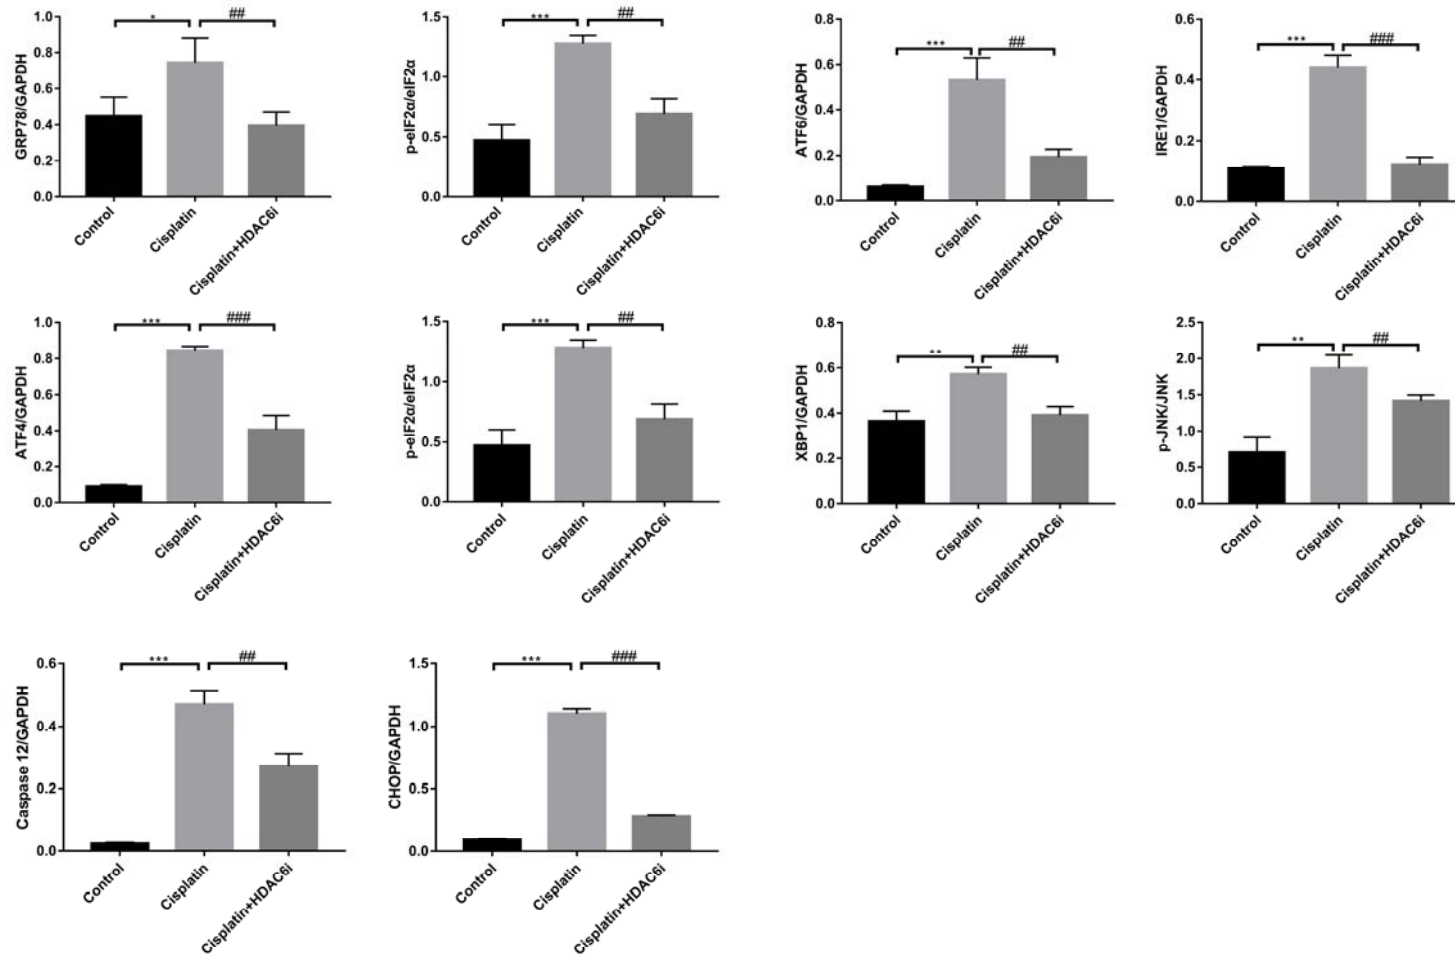

**Figure S3. Kidney proteins analysis.** The kidney tissue lysates were subjected to immunoblot analysis. Expressions of proteins were quantified by densitometry and normalized with GAPDH. Data are represented as the means ± SE (n=3). \*P<0.05, \*\*P<0.01, \*\*\*P<0.001 vs. Control; ##P<0.01, ###P<0.001 vs. Cisplatin.

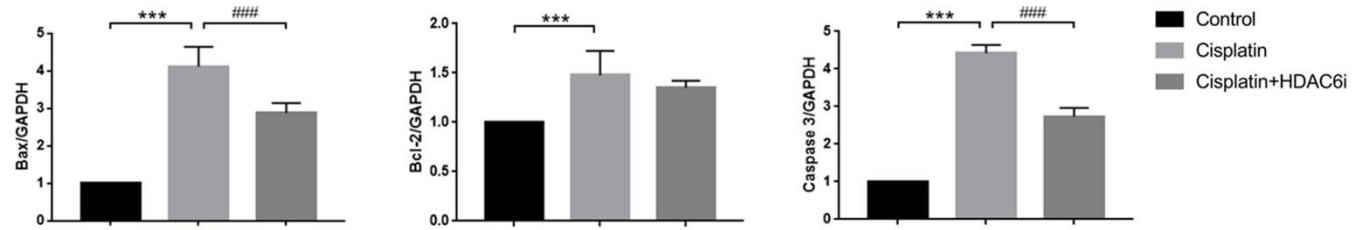

**Figure S4.** The mRNA expression of BAX, BCL-2 and Caspase 3 in the kidneys of cisplatin-induced AKI. All data are represented as the means $\pm$ SE (n=3). \*\*\*P<0.001 vs. Control, ###P<0.001 vs. Cisplatin.

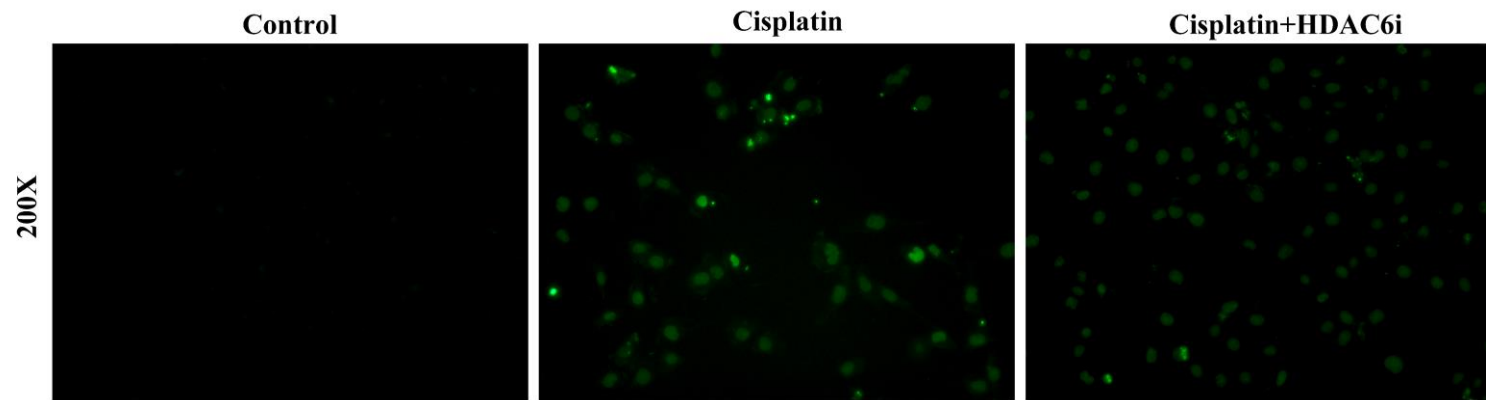

**Figure S5. TUNEL staining of cisplatin-stimulated HK-2 cells.** HK-2 cells were incubated with HDAC6i 23BB at 20 nM 30 min prior to cisplatin treatment (20  $\mu\text{g}/\text{ml}$ ) for 24 h.

Table S1. Primer sequences

| Target       | Forward                       | Reverse                       |
|--------------|-------------------------------|-------------------------------|
| GRP78        | 5'-ACACTTGGTATTGAAACTGTGG-3'  | 5'-GATCTGAGACTTCTTGGTGG-3'    |
| IL-1 $\beta$ | 5'-TGGGCCTCAAAGGAAAGAAT-3'    | 5'-CAGGCTTGTGCTCTGCTTGT-3'    |
| IL-6         | 5'-ACAACCACGGCCTTCCCTACTT-3'  | 5'-CACGATTTCCCAGAGAACATGTG-3' |
| CHOP         | 5'-CTTCTCTGGCTTGGCTGACT-3'    | 5'-TCCCTTGGTCTTCCTCCTCT-3'    |
| PERK         | 5'-GCCGACGATCAAATGGAAGC-3'    | 5'-ACCTGACTGTGATCTGCGTG-3'    |
| BCL-2        | 5'-TGTGAGGACCCAATCTGGAAA-3'   | 5'-TTGCAATGAATCGGGAGTTG-3'    |
| BAX          | 5'-GATCAGCTCGGGCACTTTAG-3'    | 5'-TTGCTGATGGCAACTTCAAC-3'    |
| ATF6         | 5'-CCTTCGACCAGTCGGGTTTG-3'    | 5'-CTGTCCCGGAAAAGGCATCC-3'    |
| ATF4         | 5'-CCTTCGACCAGTCGGGTTTG-3'    | 5'-CTGTCCCGGAAAAGGCATCC-3'    |
| KIM1         | 5'-ACATATCGTGGAATCACAACGAC-3' | 5'-ACTGCTCTTCTGATAGGTGACA-3'  |
| NGAL         | 5'-GCAGGTGGTACGTTGTGGG-3'     | 5'-CTCTTGTAGCTCATAGATGGTGC-3' |
| GAPDH        | 5'-GTATGACTCCACTCACGGCAA-3'   | 5'-GGTCTCGCTCCTGGAAGATG-3'    |
